# Supplementary material for: Stiffness control in dual color tomographic volumetric 3D printing
Source: PubMed Central journal article supplement (PMC8766567; doi:10.1038/s41467-022-28013-4), 2022-01-18
Supplement: 41467_2022_28013_MOESM2_ESM.pdf [file 41467_2022_28013_MOESM2_ESM.pdf]

## **Description of Additional Supplementary Files**

**File Name: Supplementary Movie 1.mp4**

Description: Printing of the DTU Logo

**File Name: Supplementary Movie 2.mp4**

Description: Printing of a Voronoi Tower

**File Name: Supplementary Movie 3.mp4**

Description: Printing of an Einstein Bust Figurine

**File Name: Supplementary Software.zip**

Description:

SC1. Iterative Sinogram Computation

SC2. Print simulation with inhibitor diffusion

**File Name: Supplementary Information.pdf**

Description: Supplementary Information, including

Supplementary Figures 1-13

Supplementary Tables 1-2

Supplementary Notes 1-4

**File Name: Source Data.xlsx**

Description: Compilation of all data generated or analysed in this study
